# Supplementary material
Source: MDPI journal article supplement (https://www.mdpi.com/2311-5637/10/1/32)
Supplement: s1 [file s1]

Unconserved 0 1 2 3 4 5 6 7 8 9 10 Conserved

|             |            |            |            |            |            |
|-------------|------------|------------|------------|------------|------------|
|             | 10         | 20         | 30         | 40         | 50         |
| Lpla-J16    | -----M     | AKKVYTDYFF | DEPAYNTHDG | GYIPL--VTP | KVEPQP-LAI |
| Ppen-4816   | -----      | MKNYTDYFF  | DEPAFDLHDG | GYVPL--EVS | DAPEKP-LNV |
| Lpar-4314   | -----      | MKTYTDYFF  | DEPAFDLHDG | GYVPL--EVS | DAPEKP-LNV |
| Llac-5298   | MLKFLSEGEI | TMKNYTDYFF | DEPAFDLHDG | GYVPL--EVS | DAPEKP-LNV |
| Ppar-3909   | -----M     | AKQVYNDYFF | DEPAWNTHDG | GYVPL--EEP | TTPOQK-LHV |
| Paci-5930   | -----      | MITKYLY    | DENAYDYHDG | GYRPF--KKA | PGEEHP-LNV |
| Ecol-6898   | -----M     | QRDFLKY--  | SVALGV--A  | SALPLWSRAV | FAADRPTLPI |
| Bsub-6077   | -----M     | TLEKFAD--  | --A--      | -----      | -----LPI   |
| Consistency | 0000000002 | 1353767744 | 564*443556 | 6547600433 | 2444460*49 |

|             |             |            |             |             |             |
|-------------|-------------|------------|-------------|-------------|-------------|
|             | 60          | 70         | 80          | 90          | 100         |
| Lpla-J16    | PPLLKPDQRQT | DTDDYYTVTA | QESETQFLPG  | -KKTKTWGYN  | AGFLGQTIVF  |
| Ppen-4816   | PPLLKPDKET  | ATDVYYTVTA | EAGETQLLPG  | -AKTKTWGYN  | TSLLGQTIVY  |
| Lpar-4314   | PPLLKPDKET  | ATDVYYTVTA | EAGETQLLPG  | -AKTKTWGYN  | TSLLGQTIVY  |
| Llac-5298   | PPLLKPDKET  | ATDVYYTVTA | EAGEMQLLPG  | -ATTKTWGYN  | TSLLGQTIVY  |
| Ppar-3909   | PAVLQPDKET  | DTDMYYTVTA | EEGETQLLPG  | -PKTKTWGYN  | GSLLGKTIIF  |
| Paci-5930   | PAFLKPDRIE  | GNEIYYTVTA | QAGETKILPG  | -KPTHWTWGYN | GSILGPAIQF  |
| Ecol-6898   | PDLLTTNAR-  | -NRIQLTIGA | --GQSTF-GG  | -KTATTWGYN  | GNLLGPAVKL  |
| Bsub-6077   | PDTLKPVQQQT | TEKTYEVTM  | EECAHQHLHRD | LPPTRLWGYN  | GLFPGPPTIEV |
| Consistency | *46*786656  | 3665888988 | 6467577568  | 045868****  | 5577*57956  |

|             |            |             |            |            |            |
|-------------|------------|-------------|------------|------------|------------|
|             | 110        | 120         | 130        | 140        | 150        |
| Lpla-J16    | RNGKQTHIDL | ENKL-----   | -----      | -----PEL-T | TFHWHGLNVP |
| Ppen-4816   | RRGQHTHVTL | KNTL-----   | -----      | -----PEL-T | TFHWHGANVS |
| Lpar-4314   | RRGQHTHVTL | KNTL-----   | -----      | -----PEL-T | TFHWHGANVS |
| Llac-5298   | RRGQHTHVTL | KNTL-----   | -----      | -----PEL-T | TFHWHGANVS |
| Ppar-3909   | KRGKTIHITL | KNDL-----   | -----      | -----HEL-T | TFHWHGLNVP |
| Paci-5930   | ETGKTYHVTL | KNEL-----   | -----      | -----DEV-T | TFHWHGLNIV |
| Ecol-6898   | QRGKAVTVDI | YNQL-----   | -----      | -----AEE-T | TLHWHGLEVP |
| Bsub-6077   | KRNENVYVKW | MNNLNPSEHFL | PIDHTIHHSD | SQHEEPKVKT | VVHLHG-GVT |
| Consistency | 6787456957 | 5*4*000000  | 0000000000 | 000005*60* | 87*7**4794 |

|             |            |            |            |            |            |
|-------------|------------|------------|------------|------------|------------|
|             | 160        | 170        | 180        | 190        | 200        |
| Lpla-J16    | GPITDGGCHA | -----PVY   | P-GETNHIDF | KVHQPAATTW | LHAHPCPSTA |
| Ppen-4816   | GPYVDGGCHA | -----PVY   | P-GESKHIDF | TLEQPATTLW | LHAHPCPSTA |
| Lpar-4314   | GPYVDGGCHA | -----PVY   | P-GESKHIDF | TLDQPATTLW | LHAHPCPSTA |
| Llac-5298   | GPYVDGGCHA | -----PVY   | P-GESKHIDF | TLEQPATTLW | LHAHPCPSTA |
| Ppar-3909   | GPYIDGGCHA | -----PVY   | P-GESSDIEF | VCNQPAATLW | LHAHPCPSTA |
| Paci-5930   | GPYEDGGPHA | -----PVY   | PHGERK-ITF | TVDQPAANIW | LHPHPCPETA |
| Ecol-6898   | GE-VDGGPQG | -----II    | PPGGKRTVTL | NVDQPAATCW | FHPHQHGKTG |
| Bsub-6077   | PDDSDGYPEA | WFSKDFEQTG | PYFKREVYHY | PNQQRGAILW | YHDHAMALTR |
| Consistency | 7645**7578 | 0000000686 | *077563857 | 455*88776* | 7*5*6666*7 |

|             |            |             |             |             |            |
|-------------|------------|-------------|-------------|-------------|------------|
|             | 210        | 220         | 230         | 240         | 250        |
| Lpla-J16    | TQVWKGLATM | VIIKDDVEDQ  | LPPLPRNYGVD | DIPVLVLQDRE | FHDDNQFDYR |
| Ppen-4816   | EQVWHGLAAM | VIVKDDHEAS  | LPPLPRNYGVD | DIPVILQDRR  | FHENNQWDYR |
| Lpar-4314   | EQVWHGLAAM | VIVKDDHEAS  | LPPLPRNYGVD | DIPVILQDRR  | FHENNQWDYR |
| Llac-5298   | EQVWHGLAAM | VIVKDDHEPS  | LPPLPRNYGVD | DIPVILQDRR  | FHENNQWDYR |
| Ppar-3909   | QQVWHGLATP | VVVQDDVESK  | LPPLPRNYGVD | DFPLVLQDRN  | FHEDNQWDYK |
| Paci-5930   | RQVWNGLAAP | VIIITDGHEQS | LKLP RRWGVN | DFPVVLQDRS  | YH-DNQLDYK |
| Ecol-6898   | RQVAMGLAGL | VVIEDDEILK  | LMLPKQWGID  | DVPVIVQDKK  | FNADGQIDYQ |
| Bsub-6077   | LNYYAGLVGA | YIIHDPKEKR  | LKLP S--GEY | DVPLLITDRT  | INEDGSLFYP |
| Consistency | 48*64**855 | 8995*64736  | *5**755*76  | *7*7888*95  | 77577847*6 |

|             |            |            |             |            |             |
|-------------|------------|------------|-------------|------------|-------------|
|             | 260        | 270        | 280         | 290        | 300         |
| Lpla-J16    | ADYD-----  | PDGV-Q--   | GHTALVNGTV  | NPYFDVTTQR | VRLRILDGSN  |
| Ppen-4816   | ADYD-----  | PDGV-A--   | GPTAMINGTI  | NPYFDVTTQK | VRLRFLNGAN  |
| Lpar-4314   | ADYD-----  | PDGV-A--   | GPTAMINGTI  | NPYFDVTTQK | VRLRFLDGAN  |
| Llac-5298   | ADYD-----  | PDGV-A--   | GPTAMINGTI  | NPYFDVTTQK | VRLRFLDGAN  |
| Ppar-3909   | ADYD-----  | PDGV-Q--   | GKTPMINGTI  | NPYIDVTTQR | IRLRVLDGAN  |
| Paci-5930   | ADYD-----  | VDGT-L--   | GDYALVNGTV  | NPVVNVTKPI | IRLRFLNGSN  |
| Ecol-6898   | LNVM-----  | TAAV-GWF   | GD TLLTNGAI | YPQHAAPRGW | LRLRL LNGCN |
| Bsub-6077   | SGPENPSPSL | PKPSIVPAFC | GD TILVNGKV | WPYLEVEPRK | YRFRVINASN  |
| Consistency | 7767000000 | 0067680500 | *48587**79  | 5*65686554 | 7*8*69786*  |

|             |            |             |            |            |            |
|-------------|------------|-------------|------------|------------|------------|
|             | 310        | 320         | 330        | 340        | 350        |
| Lpla-J16    | RREWRLHFND | DLEFAQVASD  | GGILPAPVYM | TKVMMTCAER | DEIVVDFGQY |
| Ppen-4816   | RREWRLHFAD | DLPFTQIGGD  | GSLLPEPVKF | THLMLTCAER | AEVIVDFGQY |
| Lpar-4314   | RREWRLHFSD | DLPFTQIGGD  | GSLLPEPVKF | THLMLTCAER | AEVIVDFGQY |
| Llac-5298   | RREWRLHFSD | DLPFTQIGGD  | GSLLPEPVKF | THLMLTCAER | AEVIVDFGQY |
| Ppar-3909   | RREFRLHFND | DLEFAQVASD  | GGIMPEPVYF | TKVMLTCAER | DEFIVDFGKY |
| Paci-5930   | RREWRLHFAD | YHPFTQIGSD  | GGLLPEAVEM | DRIMLTCAER | ADVLVNFSYD |
| Ecol-6898   | ARSLNFATSD | NRPLYVVIASD | GGLLPEPVKV | SELPVLMGER | FEVLVEVNDN |
| Bsub-6077   | TRTYNLSLDN | GGEFIQIGSD  | GGLLPRSVKL | NSFSLAPAER | YDIIIDFTAY |
| Consistency | 6*75786658 | 546858977*  | *789*76*55 | 64768768** | 4878978657 |

|             |            |            |            |            |            |
|-------------|------------|------------|------------|------------|------------|
|             | 360        | 370        | 380        | 390        | 400        |
| Lpla-J16    | QPGDEVTLMT | D-----     | DTPLCRFR   | I-KSFVPDDT | -KLPEHLVDI |
| Ppen-4816   | HEGDEVTLYT | D-----     | DVPLLKFR   | I-HAFKPDQT | -TLPDKLFDV |
| Lpar-4314   | HEGDEVTLYT | D-----     | DVPLLKFR   | I-HAFKPDQT | -TLPDKLFDV |
| Llac-5298   | HEGDEVTLYT | D-----     | DVPLLKFR   | I-HAFKPDQT | -TLPDKLFDV |
| Ppar-3909   | HDGDEVALMS | D-----     | DVPLVHFR   | I-HQFAKDET | -KLPDHLVDQ |
| Paci-5930   | QPGQEVILQT | D-----     | DFNLIKFK   | I-GDIKKENM | -LLPSPLAEI |
| Ecol-6898   | KPFDLVTLPV | SQ--MGMAIA | PFDKPHSVMR | I-QPIAISAS | GALPDTLSSL |
| Bsub-6077   | -EGQSIILAN | SEGCGGDANP | ETDANIMQFR | VTKPLAQKDE | SRKPKYLASY |
| Consistency | 4577696*36 | 7000000000 | 00*4675589 | 9044654656 | 048*63*465 |

|             |            |            |             |            |            |
|-------------|------------|------------|-------------|------------|------------|
|             | 410        | 420        | 430         | 440        | 450        |
| Lpla-J16    | PDETPTDLP  | VRTIT      | ---MDGM---  | DD---      | EVA-LD---  |
| Ppen-4816   | KAPVVDPALP | VRHV       | ---MQGM---  | DE---      | GVA-ID---  |
| Lpar-4314   | KAPVVDPALP | VRHV       | ---MQGM---  | DE---      | GVA-ID---  |
| Llac-5298   | KAPVVDPALP | VRHV       | ---MHGM---  | DE---      | GVA-ID---  |
| Ppar-3909   | PNLTVTPGTK | TRHV       | ---MSGM---  | DE---      | EVA-ID---  |
| Paci-5930   | PALSVDENTP | VFKTV      | ---MSGM---  | DD---      | QVR-LD---  |
| Ecol-6898   | PALPSLDGLT | VRKLQLSMDP | MLDMMGMQML  | MEKYGDQ--- | AMAGMDHSQM |
| Bsub-6077   | PSVQNERIQN | IRTLK      | ---LAGTQ--- | DEYGR      | PVLLLN---  |
| Consistency | 6634445455 | 8747500000 | 00094*8000  | 00000*7000 | 4870880000 |

|             |            |            |            |             |            |
|-------------|------------|------------|------------|-------------|------------|
|             | 460        | 470        | 480        | 490         | 500        |
| Lpla-J16    | -----      | GKKFDM     | -----SR    | IDARQKV---  | GDVAIWEI   |
| Ppen-4816   | -----      | GKKFAM     | -----QR    | IDATQPI---  | GKAQYWDV   |
| Lpar-4314   | -----      | GKKFAM     | -----QR    | IDATQPI---  | GKAQYWDV   |
| Llac-5298   | -----      | GKKFAM     | -----QR    | IDATQPI---  | GKAQYWDV   |
| Ppar-3909   | -----      | GKKFNM     | -----QR    | IDARQKV---  | GDVVLWDV   |
| Paci-5930   | -----      | GKLFD      | -----QR    | IDTRQQV---  | DQTQIWEV   |
| Ecol-6898   | MGHMGHGMN  | HMNHGKKFDF | HHANKINGQA | FDMNKPMPFAA | AKGQYERWVI |
| Bsub-6077   | -----      | NKRWH-     | -----DP    | VTEAPKA---  | GTTEIWSI   |
| Consistency | 0000000000 | 0000887846 | 0000000076 | 8855757000  | 0085554*59 |

|             |            |             |            |            |            |
|-------------|------------|-------------|------------|------------|------------|
|             | 510        | 520         | 530        | 540        | 550        |
| Lpla-J16    | RNTNSTENG  | MVHPFHVHGTQ | FRVLAR---  | NDG-       | -----PVY   |
| Ppen-4816   | TNSND-APGM | MVHPFHVHGTQ | FLVLSR---  | NGH-       | -----APY   |
| Lpar-4314   | TNSND-APGM | MVHPFHVHGTQ | FLVLSR---  | NGH-       | -----APY   |
| Llac-5298   | TNSND-APGM | MVHPFHVHGTQ | FLVLSR---  | NGH-       | -----APY   |
| Ppar-3909   | TNTNDMVGGM | IHPFHIHGTQ  | FLVLSR---  | NGH-       | -----APY   |
| Paci-5930   | SNTNDMEGGM | IHPFHIHGCQ  | FQLIDR---  | NGH-       | -----AVN   |
| Ecol-6898   | SGVGDM--M  | LHPFHIHGTQ  | FRILSE---  | NGK-       | -----PPA   |
| Bsub-6077   | VNPTQ--G-  | THPIHLHLVS  | FRVLDRRPFD | IARYQERGEL | SYTGPAVPPP |
| Consistency | 5857712277 | 7*8*8*778   | *588680000 | 0000008850 | 0000000664 |

|             |            |            |            |            |            |
|-------------|------------|------------|------------|------------|------------|
|             | 560        | 570        | 580        | 590        | 600        |
| Lpla-J16    | PNEHGLKDTV | GVNPGETVRI | KVKF-ELTG- | ---VYMYHCH | IIEHEDGMM  |
| Ppen-4816   | PNEHGFKDTI | GVNPGETVRL | LVRF-DLPG- | ---VYMYHCH | IIEHEDGMM  |
| Lpar-4314   | PNEHGFKDTV | GVNPGETVRL | LVRF-DLPG- | ---VYMYHCH | IIEHEDGMM  |
| Llac-5298   | PNEHGFKDTV | GVNPGETVRL | LVRF-DLPG- | ---VYMYHCH | IIEHEDGMM  |
| Ppar-3909   | PNEYGWKDTV | SVNPDEHVQI | KVRF-EYTG- | ---VYMYHCH | IIEHEDGMM  |
| Paci-5930   | PNEHGWKDTI | GVNPNETVRI | RVKF-TKLG- | ---IFMYHCH | IIEHEDTMM  |
| Ecol-6898   | THRAGWKDTV | KVE-GNVSEV | LVKF-NHDAP | KEHAYMAHCH | LIEHEDTMM  |
| Bsub-6077   | PSEKGWKDTI | QAHAGEVLR  | AVTFGPYSG- | ---RYVWHCH | IIEHEDYDMM |
| Consistency | 8785*5**9  | 5876786778 | 4*6*054380 | 0006986*** | 98****48** |

|           |            |           |            |            |            |
|-----------|------------|-----------|------------|------------|------------|
|           | 610        | 620       | 630        | 640        | 650        |
| Lpla-J16  | AQIESYDPQH | P-QTYHLM  | DTLRNAFAKE | QGIKPEDVWM | PGM-----   |
| Ppen-4816 | AQIETFDPAK | PKQEYKLMD | DTLMALAKE  | RGVKPSEIWM | GGMQSYEKMG |
| Lpar-4314 | AQIETFDPAK | PKQEYKLMD | DTLMALAKE  | RGVKPSEIWM | GGMQSYEKMG |
| Llac-5298 | AQIETFDPAK | PKQEYKLMD | DTLMALAKE  | RGVKPSEIWM | GGMQSYEKMG |
| Ppar-3909 | AQIESYDPDH | PK-TYKLMD | DTLMHAFAKE | NNIEPKDLWL | GGMGSYEKMG |
| Paci-5930 | AQIEIFDPAH | P-IEYHLM  | PHKM-----  | -----      | -----      |
| Ecol-6898 | LGFTV----- | -----     | -----      | -----      | -----      |

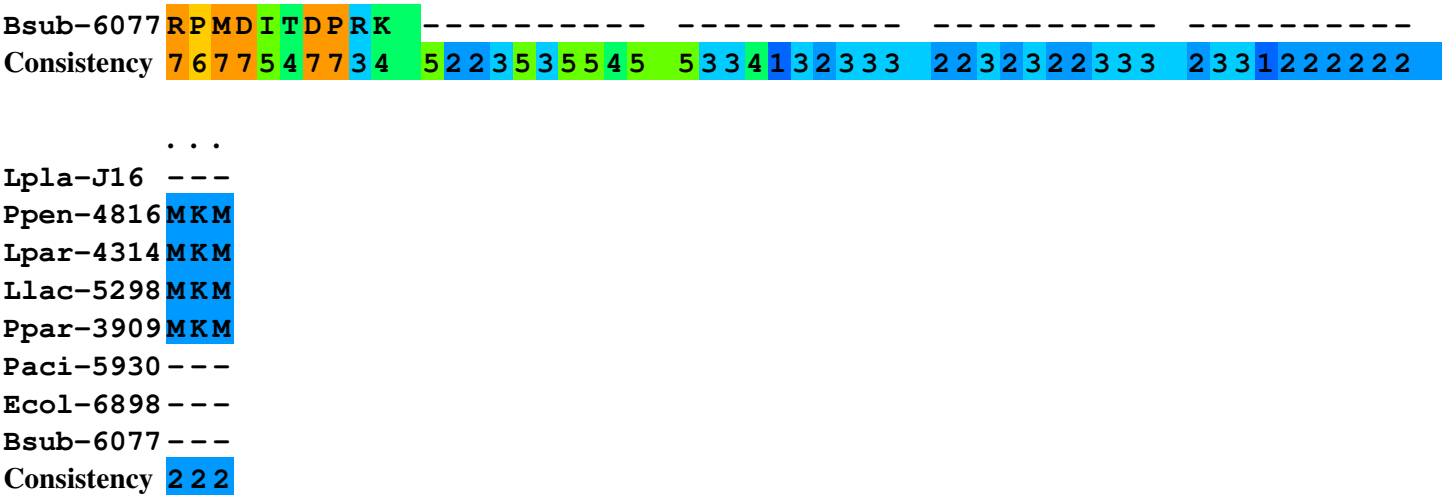

**Figure S1:** Multiple sequence alignment and conservation scoring of the *P. parvulus* 3909, *L. paracasei* 4314, and *L. lactis* 5298 laccases using Praline software [41]. The scoring scheme works from 0 for the least conserved alignment position, up to 10 for the most conserved alignment position, and the identical conserved residues are indicated by asterisks (colour scale indicated on top). Dashes indicate gaps to maximize alignment. Encased inside boxes are the motifs that form the four copper ligands and are highly conserved in laccases (conserved sequence of these motifs are HXHG, HXH, HXXHHX and HCHXXHXXXXXM/L/F [11])
